# Supplementary material
Source: PubMed Central journal article supplement (PMC3833387)
Supplement: Supp_Fig1.pdf [file Supp_Fig1.pdf]

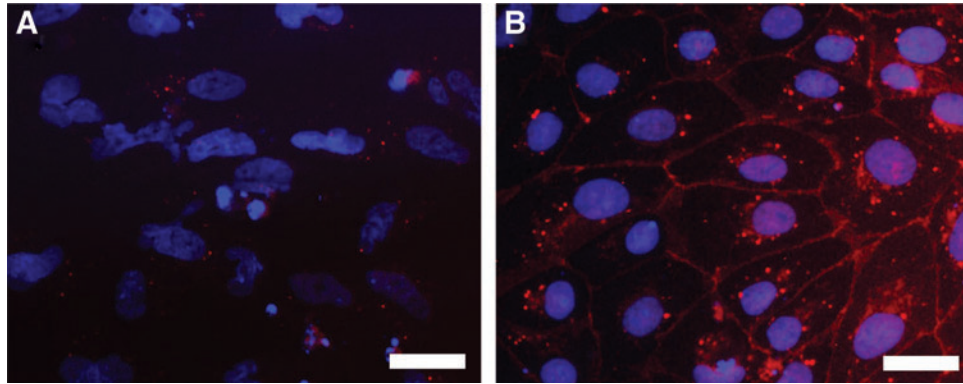

**SUPPLEMENTARY FIG. S1.** Expression of E-cadherin in H9-derived simple epithelial cells at day 7 of epithelial differentiation. Representative colonies are stained with antibody against E-cadherin (red) and Hoechst dye (blue) for day 0 human pluripotent stem cells (hPSC) densities of **(A)** 1000 and **(B)** 6500 cells/cm<sup>2</sup>. Scale bar in both panels represents 50 μm.
